# Supplementary material
Source: PubMed Central journal article supplement (PMC8443270)
Supplement: NIHMS1737173-supplement-Supplemental_Figure_1.pdf [file NIHMS1737173-supplement-Supplemental_Figure_1.pdf]

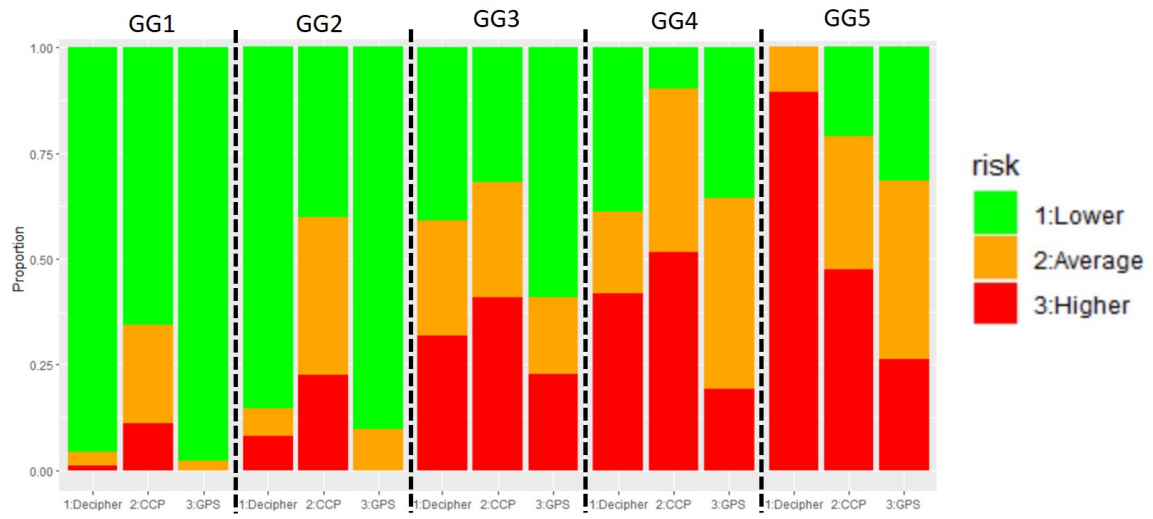

**Supplemental Figure 1:** Trends in genomic risk categories for each signature by grade group with higher risk categories in higher grade groups (trend test for proportion for each signature had  $p < 0.001$ ). Low-green, Intermediate – orange, High – red.
