# Supplementary material
Source: PubMed Central journal article supplement (PMC8443270)
Supplement: NIHMS1737173-supplement-Supplemental_Figure_2.pdf [file NIHMS1737173-supplement-Supplemental_Figure_2.pdf]

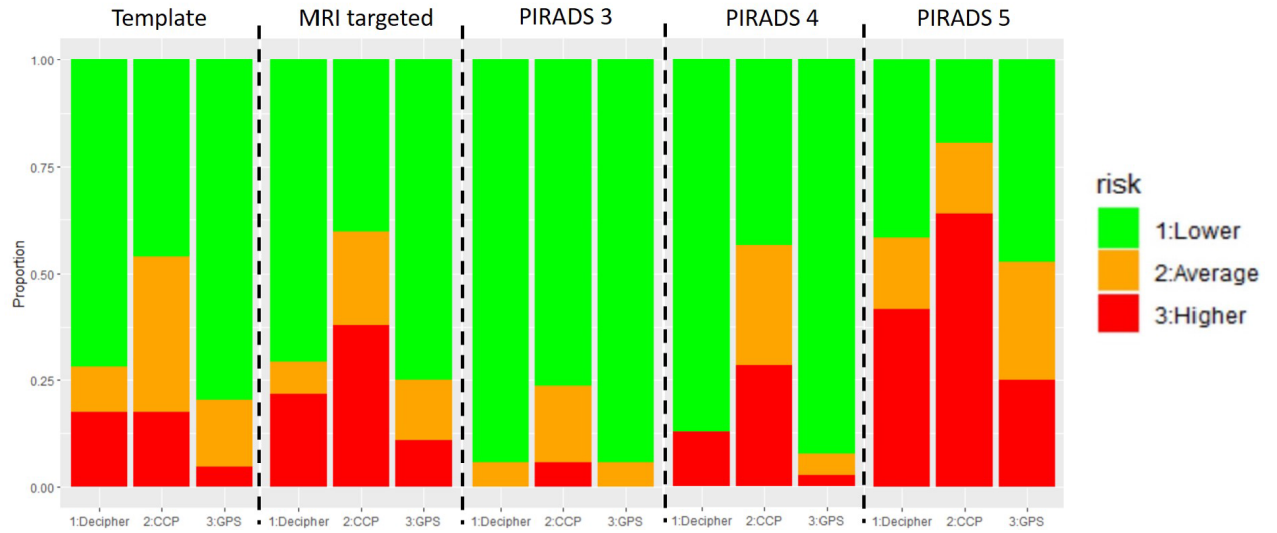

**Supplemental Figure 2:** Trends in genomic risk categories for each signature by biopsy location based on template biopsy or MRI targeted biopsy with increasing PIRADS scores. We found no difference in genomic risk classification between MRI targeted and template biopsy for any signature, but all signatures had higher risk categories in higher PIRADS levels (trend test for proportion for each signature had  $p < 0.001$ ). Low-green, Intermediate – orange, High – red.
